# Supplementary material for: The Preclinical Natural History of Serous Ovarian Cancer: Defining the Target for Early Detection
Source: PLoS Med. 2009 Jul 28;6(7):e1000114. doi: 10.1371/journal.pmed.1000114 (PMC2711307; doi:10.1371/journal.pmed.1000114)
Supplement: Table S1 — Detailed findings in PBSO studies on which analyses of occult serous cancers were based. (0.05 MB XLS) [file pmed.1000114.s010.xls]

## Sheet: Table S1
Detailed findings in PBSO studies on which analyses of occult serous cancers were based.
Source Study	Genotype	Patient age	Histology	Serous histology for cals	Location	Stage	Stage for calcs	Size	Size for calcs	Grossly detectable	Recurrence	Study Size	Cohort age - mean*	Included in prevalence calcs?	# BRCA1 patients for prevalence	# occult serous cancers in BRCA1 patients for prevalence	# BRCA2 patients for prevalence	#occult serous cancers in BRCA2 patients for prevalence	# BRCA- or indeterminate patients for prevalence	#of occult serous cancers in BRCA- or unspecified genotype patients for prevalence	Reason for inclusion in, or exclusion from prevalence calculation	Pathology work-up description	Notes
STUDIES WITH METICULOUS PATHOLOGY
Callahan et al, 2007	BRCA2	44	serous	1	FT	TIC	0	microscopic	microscopic	N		60	43	Y	60	2	60	3	2	0	Out of 122 women who had RRSO in the inteval studied, 60 each had BRCA1 or BRCA2 mutations and 2 had an unspecified BRCA mutation. Thus any acertainment bias would have to be very small.	Either entire adnexa sectioned at 2-3mm intervals or SEEFIM protocol used (switched to latter about 3/4 way through the study).
Callahan et al, 2007	BRCA2	66	serous	1	FT	TIC	0	microscopic	microscopic	N
Callahan et al, 2007	BRCA2	76	serous	1	FT	IIIA	3	<1cm	10	Y
Callahan et al, 2007	BRCA1	44	serous	1	FT	TIC	0	microscopic	microscopic	N
Callahan et al, 2007	BRCA1	62	endometrioid	0	FT	I	1	microscopic	microscopic	N
Callahan et al, 2007	BRCA1	61	serous	1	FT	Ic	1	microscopic	microscopic	N
Callahan et al, 2007	BRCA1	51	endometrioid	0	FT	IIA	2	microscopic	microscopic	N
Olivier et al, 2004	BRCA1	33	endometroid	0	FT	Ia	1	2.5mm	2.5	N		58	46	Y	58	4	6	0	0	0	Some of the genotyping was done after prophylactic surgery, but it seems that the testing was done irrespective of diagnosis.	Ovaries and FTs "entirely sectioned" but no sectioning interval specified.
Olivier et al, 2004	BRCA1	49	serous GII	1	FT	IIIb	3	10mm	10	N	20m
Olivier et al, 2004	BRCA1	45	"adenoca" GIII	1	FT and ovary	IV	4	5mm	5	N	11m
Olivier et al, 2004	BRCA1	47	serous GII	1	ovary	Ic	1	8mm	8	N
Olivier et al, 2004	BRCA1	37	serous GII	1	ovary	Ia	1	not stated (microscopic)	microscopic	N
Laki et al, 2007	BRCA1	46	"adenoca"	1	FT	IA	1	Not grossly visible at surgery	microscopic	N		56	48	Y	56	3	33	1	0	0	It seems genotyping preceded counseling to undergo RRSO	"Systematic microsectioning and histopathological exam of serial sections of all ovary and FT tissues"	US exam in 46 women before SO, all normal. CA125 in 39 women before SO, all normal. Need to find out whether "cystadenocarcinoma" is compatible with serous. (The term is sometimes used together with serous).
Laki et al, 2007	BRCA1	55	cystadenoca	1	ovary	IIC	2	Not grossly visible at surgery	microscopic	N
Laki et al, 2007	BRCA1	53	adenoca	1	FT	IA	1	Not grossly visible at surgery	microscopic	N
Laki et al, 2007	BRCA2	54	cystadenoca	1	FT and ovary	IIIC	3	Not grossly visible at surgery		N	metastatic disease
Powell et al, 2005	BRCA2	50	poorly diff serous	1	FT	Ia	1	2.7mm & 1.7 mm	2.90818	N		43	47	Y	43	5	24	2	0	0	Genotype preceeded RRSO	Entire ovaries and FTs examined at 2mm sectioning interval.	2 patients who did not have detectable occult cancer developed peritoneal CA within 5 yrs after RRSO - neither was in compulsive protocol group (vs. 100% of patients with occult cancers). Stages inferred from description in paper.
Powell et al, 2005	BRCA2	53	HG serous	1	FT	Ia	1	12 mm	12	Y
Powell et al, 2005	BRCA1	52	HG serous	1	FT	Ic	1	2.2 mm	2.2	N
Powell et al, 2005	BRCA1	42	HG dysplasia serous	1	FT	CIS	0	microscopic	microscopic	N
Powell et al, 2005	BRCA1	49	poorly diff serous	1	ovary	Ia	1	0.9 mm	0.9	N
Powell et al, 2005	BRCA1	54	HG serous	1	ovary	Ia	1	microscopic	microscopic	N
Powell et al, 2005	BRCA1	54	mod diff serous	1	ovary	Ia	1	microscopic	microscopic	N
Lamb et al, 2006	BRCA1	48	HG serous	1	peritoneal	IIIC	3	disseminated pelvic disease, bulky	100	Y	persistent	40	47	Y	40	5	22	1	0	0	24 of 113 women were not tested. If the fraction of BRCA1 positive women in the untested group was the same as in the tested group, there would actually have been 51 BRCA1+ women in the study group. Of the cancers, 5/6 cancers in genotyped women were BRCA1+. If we assume that the untested woman with cancer has an 83% probability of being BRCA1+, then the prevalence of occult cancer in BRCA1 women…	"complete sectioning of fallopian tubes and ovaries" at 2-3 mm intervals, so qualifies as meticulous.	stages inferred from description in paper; (4 previously in Leeper 2002); Median 28 months follow up
Lamb et al, 2006	BRCA1	47	HG serous	1	FT	IC	1	"microscopic" CIS 8mm max diam	8	N
Lamb et al, 2006	BRCA1	62	HG serous	1	FT	IC	1	"microscopic" 7mm max diam	7	N	17mo
Lamb et al, 2006	BRCA1	52	HG serous	1	FT	CIS	0	"microscopic" CIS	microscopic	N
Lamb et al, 2006	BRCA1	46	HG serous	1	FT	CIS	0	"microscopic" CIS	microscopic	N
Lamb et al, 2006	BRCA2	65	HG serous	1	FT	CIS	0	"microscopic" CIS (<1cm)	microscopic	N
Lamb et al, 2006	unknown	48	borderline	0	ovary
Medeiros et al, 2006	BRCA1	44	serous	1	FT	CIS	0	2	2	N		6	55	N	N/A	N/A	N/A	N/A	N/A	N/A	Description unclear - the study was initiated "following the discovery" of an occult fimbrial cancer in a BRCA (not specified) RRSO specimen. This is referred to as the "index case", which suggests that it might be included in the reported cohort. Since the one serous cancer in a BRCA1 patient was in the ampulla and not the fimbria, it cannot be the index case. So the prevalence of occult serous …	Either serial sectioning at 2-3mm intervals with complete sectioning of fimbrae (7/26 patients), or SEEFIM protocol (19/26 patients). The 26 patients included 6 BRCA1 positive and 7 BRCA2 positive RRSOs, and a control set of 13 non-BRCA-mutated patients undergoing salpingo-oopherectomy (typically TAH) for other indications (cervical or endometrial). From description, sounds like all cancers were …
Medeiros et al, 2006	BRCA1	62	endometroid	0	FT	I	1	7	7	N
Medeiros et al, 2006	BRCA2	76	serous	1	FT	advanced	3	1.2	1.2	N
Medeiros et al, 2006	BRCA2	66	serous	1	FT	CIS	0	1	1	N
Medeiros et al, 2006	BRCA2	43	serous	1	FT	CIS	0	1	1	N
STUDIES WITH NON-METICULOUS PATHOLOGY
Finch et al, 2006	BRCA1	42	HG serous	1	FT	Ib	1	15mm	15	Y		94	47	Y	94	6	65	1	0	0	Note: the 159 patients in this study included 60 patients (including 38/39of the BRCA1 or BRCA2 carriers) in the previous Colgan et al study. "a small number of patients" in this study were genotyped after surgery. Bias toward (or against) genotyping patients with occult cancer not noted. Probably OK (but not perfect) to include in prevalence calculations. Need to segregate from the Colgan patien…	From Jan 1992-2000, (68 patients) only representative sections of FT's examined. From 2000-June 2004 (91 patients), both FTs and ovaries were sectioned and microscopically examined "in their entirety" (not specified in greater detail).	All but one of 39 patients from Colgan 2001 are included here - so 2/67 additional BRCA1 patients had cancer - patients reported in Finch are not included in the list for Colgan All but one (the 59 yo in Colgan) had negative ultrasound between 1 and 9 months prior to RRSO (average 5). 4 of 7 had CA125 average of 4mo earlier, all negative. [Since the ascertainment is clearer for Finch, tumors over…
Finch et al, 2006	BRCA1	44	HG serous	1	FT	IIa	2	1.6mm	1.6	N
Finch et al, 2006	BRCA2	53	NS - primary peritoneal	1	peritoneal		3	1mm (largest focus)	1	N
Finch et al, 2006	BRCA1	40	HG serous	1	ovary	Ia	1	< 1mm	1	N
Finch et al, 2006	BRCA1	48	HG serous	1	FT and ovary	IIb	2	50mm	50	Y
Finch et al, 2006	BRCA1	59	HG serous	1	FT and ovary	IIc	2	not specified 4 "foci" - not grossly visible	3.1748	N
Finch et al, 2006	BRCA1	64	HG serous	1	FT	CIS	0	microscopic	microscopic	N
Carcangiu et al, 2006	BRCA1	73	HG serous	1	ovary	IIIC	3	<15mm	15	Y	72 mo	37	50	Y	37	6	13	0	0	0	Prospective - genotyping carried out before PO	Not meticulous. 20/50 complete sectioning of ovaries and tubes, the rest only partial examination, all but one of these tumors wwas surgically occult and discovered only during microscopic examination - but the paper doesn't say which of the tumors was grossly evident. (So I labeled one of the larger tumors as grossly detectable, arbitrarily chosen).	44 of the 50 total patients had BSO. The rest had either bilateral oopherectomy (3) or unilateral SO.
Carcangiu et al, 2006	BRCA1	46	HG serous	1	ovary	IIIC	3	<15mm	15	N
Carcangiu et al, 2006	BRCA1	42	HG serous	1	FT	IIB	2	3mm	3	N	19 mo
Carcangiu et al, 2006	BRCA1	49	CIS	1	FT	CIS	0	<4mm	4	N
Carcangiu et al, 2006	BRCA1	61	CIS	1	FT	CIS	0	<4mm	4	N
Carcangiu et al, 2006	BRCA1	48	CIS	1	FT	CIS	0	<4mm	4	N
Colgan et al, 2001	BRCA1	NS	HG serous	1	FT	NS	1	microscopic	microscopic	N		27	NS	N	N/A	N/A	N/A	N/A	N/A	N/A	Genotyping was either before or after surgery and was not performed on all patients, so there might be a bias toward BRCA1 genotypes documented in patients with cancer as opposed to those without, if diagnosis affected decision to get genotyped. Note that most of the patients in this study were also among the patients in the Finch et al. 2006 gyne onc study. (overlaps with Finch et al 2006 gyne o…	For 20 of the 60 cases in this study, the fallopian tubes were completely sectioned and examined. For 40 of the cases only "representative" samples were embedded and sectioned. So mostly not "meticulous". Note that the procedure was called "oopherectomy" but in fact was BSO.
Lu et al, 2000	BRCA1	49	HG serous	1	FT and ovary	IIA	2	1 mm several foci	1.5874	N		18	46	Y	18	1	1	0	0	0	For prevalence calculation: 18 of the BRCA1+ women were genotyped pre-operatively, one of these had a cancer detected on PBSO. So could use 1/18 as the prevalence. 1 of the BRCA2 women was genotyped pre-operatively and she didn't have cancer (the one with cancer was a post-op genotype).	According to the description in the paper, 18/20 of the BRCA1 patients were identified pre-operatively. 2/20 were identified after an occult cancer was discovered at PO. Thus, the prevalence should be inferred to be 1/18. In 37 of the 50 total cases (diagnosed at Dana Farber/Brighams), ovaries and FT's were entirely sectioned at 2-3mm intervals. In the rest (diagnosed at outside hospital and revi…	Size for calcs is diameter of equivalent sphere of sum of volumes.
Lu et al, 2000	BRCA1	40	borderline	0	ovary			8-10 mm	10	Y
Lu et al, 2000	BRCA1	49	borderline	0	ovary			4 mm	4	N
Lu et al, 2000	BRCA2	65	HG serous	1	FT and ovary		1	2mm and microscopic	2	N
Agoff et al, 2000	BRCA1	63	serous	1	FT	Ic	1	<7mm	7	N		<29	NS	N					29	4	4 of the patients with occult cancers (bold) were from a series of 29 RRSOs at UW between 1996-2001.	Complete sectioning at 3-4mm intervals - not meticulous - will miss some,but better than most.	Since the denominator (29 consecutive patients) didn't distinguish genotypes, the 4 patients in this group found to have occult cancer are listed in the indeterminate group even though they actually have known genotypes.
Agoff et al, 2000	BRCA1	47	serous	1	FT	Ic	1	<8mm	8	N
Agoff et al, 2000	BRCA2	65	serous	1	FT	Ia	1	2mm	2	N
Agoff et al, 2000	unknown	74	serous	1	FT	If	1	4mm	4	N
Agoff et al, 2000	unknown	43	serous	1	FT	If	1	9mm	9	Y
Agoff et al, 2000	BRCA1	48	serous	1	peritoneal	IIIc	3	multiple <5mm	10	Y
NS = Not specified
* when mean age was only given for entire series, irrespective of genotype, we assumed that the mean age for the BRCA1 women in the series was the same as the overall mean.
STUDIES EXCLUDED	Reason for exclusion								Citation
Finch, 2006**	Tumor histology not specified. No description of pathology protocol provided								Finch A, Shaw P, Rosen B, Murphy J, Narod SA, et al. (2006) Clinical and pathologic findings of prophylactic salpingo-oophorectomies in 159 BRCA1 and BRCA2 carriers. Gynecol Oncol 100: 58-64.
Kauff, 2002	Tumor histology not specified								Kauff ND, Satagopan JM, Robson ME, Scheuer L, Hensley M, et al. (2002) Risk-reducing salpingo-oophorectomy in women with a BRCA1 or BRCA2 mutation. N Engl J Med 346: 1609-1615.
Leeper, 2002	All 5 of the patients in this study were included in Lamb et al 2006.								Leeper K, Garcia R, Swisher E, Goff B, Greer B, et al. (2002) Pathologic findings in prophylactic oophorectomy specimens in high-risk women. Gynecol Oncol 87: 52-56.
Paley, 2001	Anecdotal, no denominator.								Paley PJ, Swisher EM, Garcia RL, Agoff SN, Greer BE, et al. (2001) Occult cancer of the fallopian tube in BRCA-1 germline mutation carriers at prophylactic oophorectomy: a case for recommending hysterectomy at surgical prophylaxis. Gynecol Oncol 80: 176-180.
Rebbeck, 2002	Procedure was "prophlyactic oopherectomy" - not salpingo-oopherectomy. Retrospective study design (potential bias in genotyping positive POs)								Rebbeck TR, Lynch HT, Neuhausen SL, Narod SA, Van't Veer L, et al. (2002) Prophylactic oophorectomy in carriers of BRCA1 or BRCA2 mutations. N Engl J Med 346: 1616-1622.
Scheuer, 2002	Tumor histology not specified								Scheuer L, Kauff N, Robson M, Kelly B, Barakat R, et al. (2002) Outcome of preventive surgery and screening for breast and ovarian cancer in BRCA mutation carriers. J Clin Oncol. 20(5):1260-8
